# Supplementary material for: Energy and cost-saving potential of combined carbon capture and conversion: a pioneering design of a process intensification concept harnessing CeO2 as a dual-functional material
Source: Royal Society of Chemistry journal article supplement (doi:10.1039/d4gc04346d), 2024-12-18
Supplement: d4gc04346d1.pdf [file d4gc04346d1.pdf]

113 **Supplemental Material: Energy and cost-saving potential of combined carbon capture**  
114 **and conversion: a pioneering design of a process intensification concept harnessing CeO<sub>2</sub>**  
115 **as a dual-functional material**

116

117

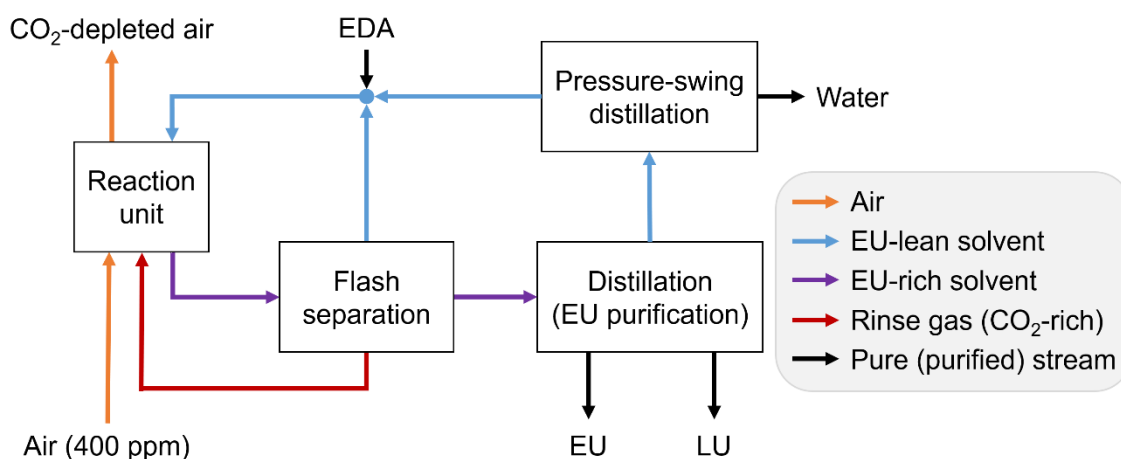

Figure 1 Schematic of the quad-C EU production process

118

119 **S1. Specifications of unit models in Aspen simulations**

120 *S1.1. Reaction unit without air-drying*

121 The reaction unit was simulated using two Rstoic unit models in Aspen Plus because an  
122 Rstoic reaction unit can define chemical reactions under one specific set of operating conditions.

123 The first one was used for the CO<sub>2</sub> adsorption and rinse gas injection, solvent inflow for  
124 the ethyleneurea (EU) retrieval using lean-EU ethylenediamine (EDA) liquid due to their  
125 identical operating conditions (298 K and 1 atm). This unit model features one input stream for  
126 ambient CO<sub>2</sub> and three recycle streams: lean-EU EDA solvent, rich-EU solvent (an internal

127 recycle stream as described in **Figure 3**), and a rinse gas stream. It has a single outlet stream  
128 where the EDA-CA/EDA ratio is measured, which then feeds into the second Rstoic model.

129 The synthesis of EU and linear urea (LU) was simulated at 363 K and 1 atm<sup>1</sup> in the second  
130 unit model, which has two outlet streams: an internal recycle stream to concentrate EU and  
131 rich-EU solvent for chemical separation.

132 Figure S1 shows the process flow diagram (PFD) of the entire reaction unit as simulated  
133 in Aspen Plus.

134

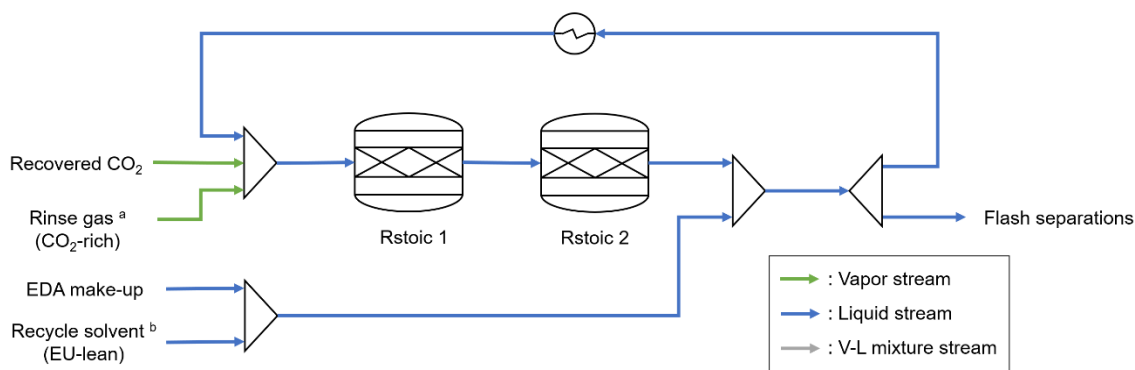

**Figure S1 PFD of the entire reaction unit in Aspen Plus**

135

### 136 *S1.2. Flash separation system*

137 The flash separation system consists of one Rstoic unit and three flash separators (**Figure**  
138 **4**). The operating conditions for the flash separation system is shown in **Table S1**. According  
139 to the literature<sup>2,3</sup>, it is imperative to carefully control the EDA-CA content and temperature  
140 of the EDA liquid for reliable process operations, as EDA-CA facilitates EU formation under

141 high-temperature conditions. Considering that EU and LU had high boiling points and  
142 subsequent distillation systems operated at high temperatures, this study assumed that the  
143 EDA-CA discharged from the reaction unit would readily decompose in Flash 1. The operating  
144 pressure for Flash 4 was set to maintain a consistent temperature of 130°C.

145

146 **Table S1 Operating conditions for the flash separation system**

| <b>Equipment</b> | <b>Temperature [°C]</b> | <b>Pressure [atm]</b> |
|------------------|-------------------------|-----------------------|
| Flash 1          | 160                     | 2.50                  |
| Flash 2          | 140                     | 1.50                  |
| Flash 3          | 25                      | 1.00                  |
| Flash 4          | 130                     | Varying               |

147

### 148 *S1.3. Distillation system for EU purification*

149 The EU purification system has two distillation columns which have been modelled using  
150 Radfrac units. The first distillation column separates EU and LU from other chemical  
151 substances, and the second column separates EU from LU at a high purity. The operating  
152 conditions for the EU purification were determined to obtain 99 wt% EU and 97 wt% LU, as  
153 shown in **Table S2**, depending on the recycled EU-rich solvent ratio (SR) in the reaction unit.

154

155

**Table S2 Operating conditions for the EU purification system**

| <b>Equipment</b> | <b>Number of stages [-]</b> | <b>Feed stage [-]</b> | <b>Pressure [atm]</b> | <b>Reflux ratio (mole-basis) [-]</b> | <b>Distillate rate [mol/h]</b> |
|------------------|-----------------------------|-----------------------|-----------------------|--------------------------------------|--------------------------------|
| COL 1            | 40                          | 37                    | 1.0                   | 0.7                                  | 180.1 ~ 242.2                  |
| COL 2            | 20                          | 5                     | 0.1                   | 3.0                                  | 97.3                           |

156

157 *Sl.4. Pressure-swing distillation system*

158 The pressure-swing distillation system comprises two distillation columns, and both  
 159 columns are modelled using Radfrac units, as shown in **Figure 6**. The system has a recycle  
 160 stream, transferring water-EDA mixture from the bottom stream of the second column back to  
 161 the feed stream of the first one. **Table S3** represents the specifications of the pressure-swing  
 162 distillation, as the distillate rate changes depending on the SR values.

163

164

**Table S3 Operating conditions for the pressure-swing distillation**

| <b>Equipment</b> | <b>Number of stages [-]</b> | <b>Feed stage [-]</b> | <b>Pressure [atm]</b> | <b>Reflux ratio (mole-basis) [-]</b> | <b>Distillate rate [mol/h]</b> |
|------------------|-----------------------------|-----------------------|-----------------------|--------------------------------------|--------------------------------|
| COL 3            | 35                          | 10                    | 0.2                   | 5.5 ~ 7.5                            | 111.4 ~ 180.1                  |
| COL 4            | 30                          | 10                    | 5.0                   | 15 ~ 20                              | 96.8 ~ 97.5                    |

165

166 The vapour-liquid equilibria between water and EDA at 0.2, 1.0, and 5.0 atms are depicted  
167 in **Figure S2**. Comparing these results with those from a previous study <sup>4</sup>, the vapor-liquid  
168 equilibria at 0.2 and 1.0 atms simulated in Aspen Plus show good agreement. However, the  
169 case at 5.0 atmospheres exhibits a slight deviation in the molar fraction at the azeotrope. For  
170 detailed modelling, corrections to the vapor-liquid equilibria may be necessary for high-  
171 pressure operations.

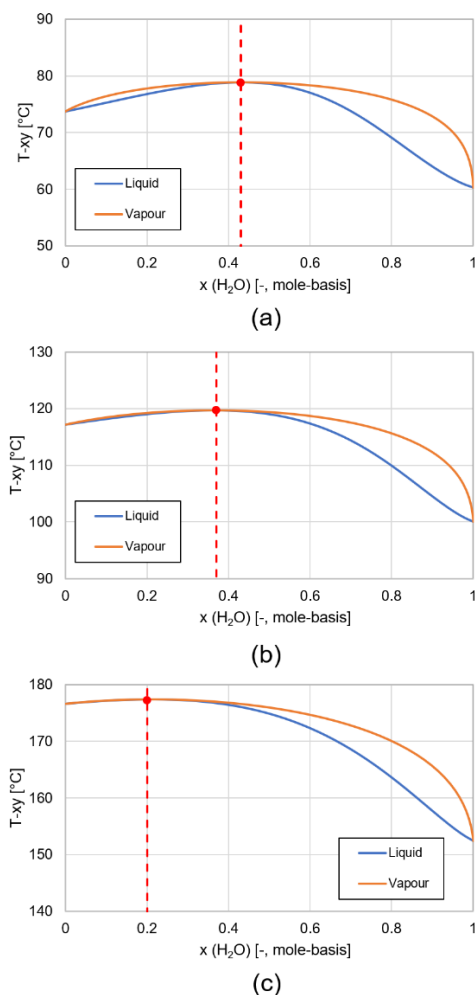

**Figure S2 Vapour-liquid equilibria between water and EDA at (a) 0.2, (b) 1.0, and (c) 5.0 atms**

172 **S2. Details of sensitivity analysis on energy requirements for air-loading**

173 *S2.1. Example of input data for Python programming execution*

174 **Table S4 Input data on equation coefficients (v = 1 m/s, l = 1 m)**

| <b>ep<sup>3</sup></b> | <b>ep<sup>2</sup></b> | <b>ep<sup>1</sup></b> | <b>ep<sup>0</sup></b> |
|-----------------------|-----------------------|-----------------------|-----------------------|
| 119.969               | -2713.31              | 7479.552              | -4766.25              |
| 179.992               | -2713.31              | 7479.552              | -4766.25              |
| 240.04                | -2713.31              | 7479.552              | -4766.25              |
| 300.114               | -2713.31              | 7479.552              | -4766.25              |
| 361.879               | -2713.31              | 7479.552              | -4766.25              |
| 421.396               | -2713.31              | 7479.552              | -4766.25              |
| 480.734               | -2713.31              | 7479.552              | -4766.25              |
| 540.819               | -2713.31              | 7479.552              | -4766.25              |
| 600.935               | -2713.31              | 7479.552              | -4766.25              |
| 661.088               | -2713.31              | 7479.552              | -4766.25              |
| 721.43                | -2713.31              | 7479.552              | -4766.25              |
| 781.699               | -2713.31              | 7479.552              | -4766.25              |
| 841.999               | -2713.31              | 7479.552              | -4766.25              |
| 902.324               | -2713.31              | 7479.552              | -4766.25              |
| 962.674               | -2713.31              | 7479.552              | -4766.25              |
| 1023.051              | -2713.31              | 7479.552              | -4766.25              |
| 1083.573              | -2713.31              | 7479.552              | -4766.25              |
| 1143.992              | -2713.31              | 7479.552              | -4766.25              |
| 1204.437              | -2713.31              | 7479.552              | -4766.25              |

Note: ep<sup>3</sup> = a, ep<sup>2</sup> = -b, ep<sup>1</sup> = 2b + c, ep<sup>0</sup> = - (b + c)

175 *S2.2. Python programming code for the sensitivity analysis*

```
8 import numpy as np
9 import pandas as pd
10
11 df = pd.read_csv('Air-L_input.csv')
12
13 PD_input = df.values.tolist()
14 PD_output = [0]*len(PD_input)
15 cnt = 0
16
17
18 for i in range(len(PD_input)):
19     sol_row = np.roots(PD_input[i])
20
21     for j in range(len(sol_row)):
22         if np.isreal(sol_row[j]) and 0 < sol_row[j] < 1:
23             PD_output[i] = np.real(sol_row[j])
24
25 out_df = pd.DataFrame(PD_output)
26
27 out_df.to_csv("out.csv", float_format='%.5f')
```

**Figure S3 Python code for the sensitivity analysis**

176

177

178 **S3. Analysis of the cost of raw materials and energy for EU production**

179 *S3.1. Conventional EU production*

180 The commercial process for EU production converts EDA and urea into EU with the  
181 ethylene glycol solvent. The schematic diagram of this process is shown in **Figure S4**<sup>5</sup>. The  
182 source of the process scheme for commercial EU production was provided by Hebei  
183 Kangzhuang (China), which is the second largest EU producer in the world.

184

185

186

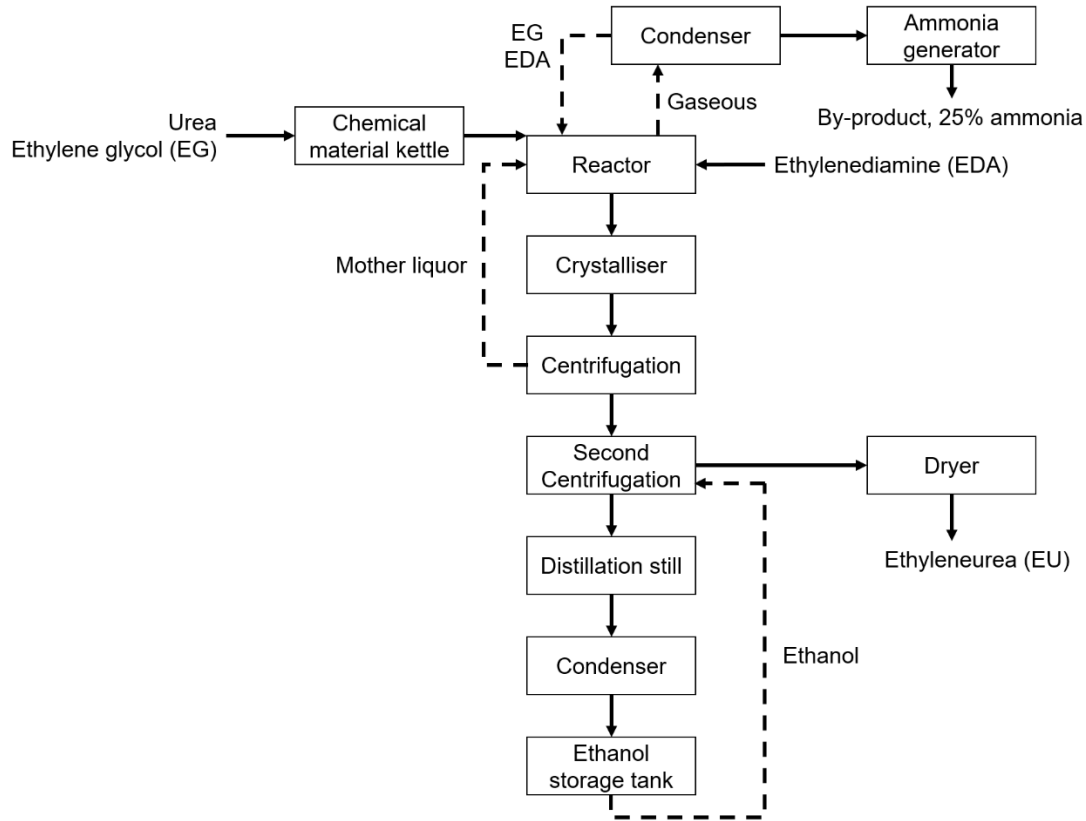

**Figure S4 Schematic diagram of commercial EU production process**

187

188 *S3.2. The cost of raw materials and energy for EU production*

189 Table --- indicates the cost of raw materials and energy for EU production report by the

190 market analysis references <sup>5, 6</sup>. The Japan's market analysis report provides the EDA cost by

191 the JPY, and the cost base year cost is fixed on the average currency exchange rate (110.5

192 JPY/USD). The base year cost in Table S5 was fixed on the 2023 fiscal year basis according to

193 the Chemical Engineering Plant Cost Index (CEPCI) <sup>7</sup>.



194

195

**Table S5 Cost reported by market analysis references**

| <b>Process</b>                                       | <b>Item</b>                 | <b>Base year cost</b> | <b>Notes</b>                      |
|------------------------------------------------------|-----------------------------|-----------------------|-----------------------------------|
|                                                      |                             | <b>[USD/kg-EU]</b>    |                                   |
| Commercial process<br>(Case I)                       | EDA + Urea (+ EG)<br>Energy | 6.11<br>0.12          | 2020 fiscal year basis,<br>Ref. 5 |
| CeO <sub>2</sub> -based process<br>(Case II and III) | EDA                         | 3.88                  | 2018 fiscal year basis,<br>Ref. 6 |

196

197

**S4. Exploration of process intensification from conceptual process design***S4.1. Air drying in the reaction column*

By applying the air-drying to the process intensification approach, the cyclic operation of the reaction unit changed as shown in **Figure S5**. To simulate the water removal from the reaction unit, the simple separation unit model was employed after the two Rstoic models to examine the effect of the water removal prior to a series of the chemical separation. The process flow diagram for Aspen simulations is represented in **Figure S6**. The compressor-type dehydration part was modelled independently from other simulation parts. It should be noted that liquid-phase water discharged from the reaction unit was completely transformed in the

207 vapour phase by contacting the dry air due to a relative humidity of the wet air (10%).

208

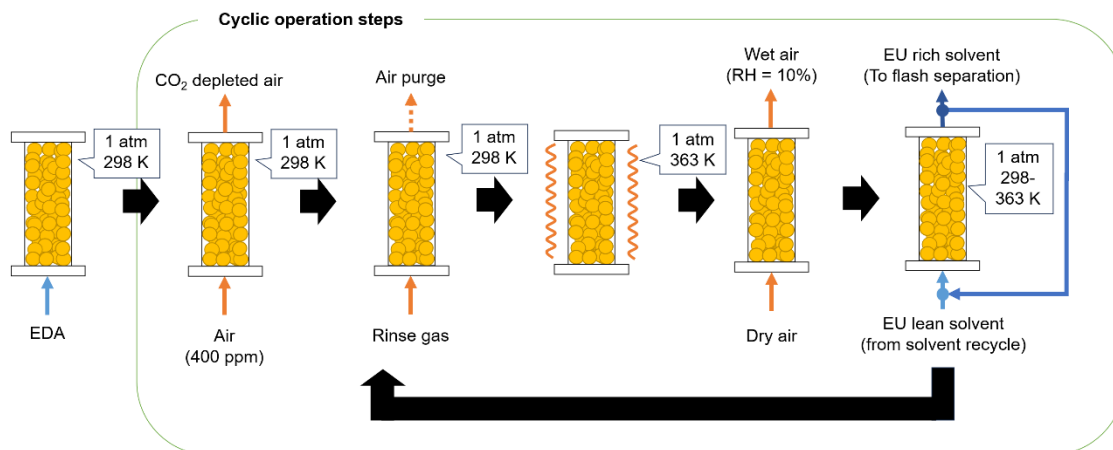

**Figure S5 Operating procedures for the reaction unit with air-drying**

Note: RH: relative humidity

209

210

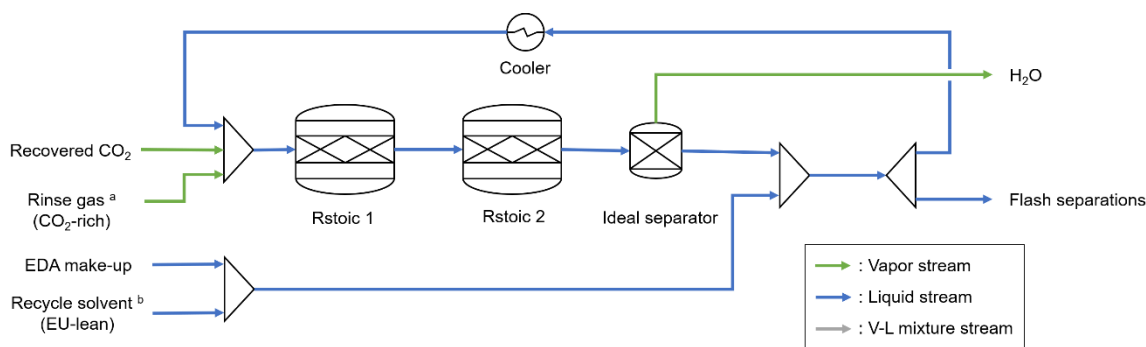

**Figure S6 PFD of the entire reaction unit with air-drying as simulated in Aspen Plus**

211

212

213 **References**

- 214 1. R. Fujii, M. Yabushita, D. Asada, M. Tamura, Y. Nakagawa, A. Takahashi, A. Nakayama and K.  
215 Tomishige, *ACS Catalysis*, 2023, **13**, 1562-1573.
- 216 2. Dow Chemical Company, *Ethylenediamines: storage and handling*, 2001.
- 217 3. B. Yoon and G. S. Hwang, *Phys Chem Chem Phys*, 2020, **22**, 17336-17343.
- 218 4. A. M. Fulgueras, J. Poudel, D. S. Kim and J. Cho, *Korean Journal of Chemical Engineering*, 2015, **33**,  
219 46-56.
- 220 5. Prof Research, *2021 Global and Chinese 2-imidazolidinone (Ethylene urea) industry report*, 2021.
- 221 6. L. The Chemical Daily Co., *17019 of Chemical Products (Japanese)*, 2019.
- 222 7. Chemical Engineering, Chemical engineering plant cost index (CEPCI),  
223 <https://www.chemengonline.com/pci-home>, (accessed October 18, 2024).
- 224
